# Supplementary material
Source: PubMed Central journal article supplement (PMC6669331)

Supplemental Figure 1. Flow Chart of Study Participant Selection

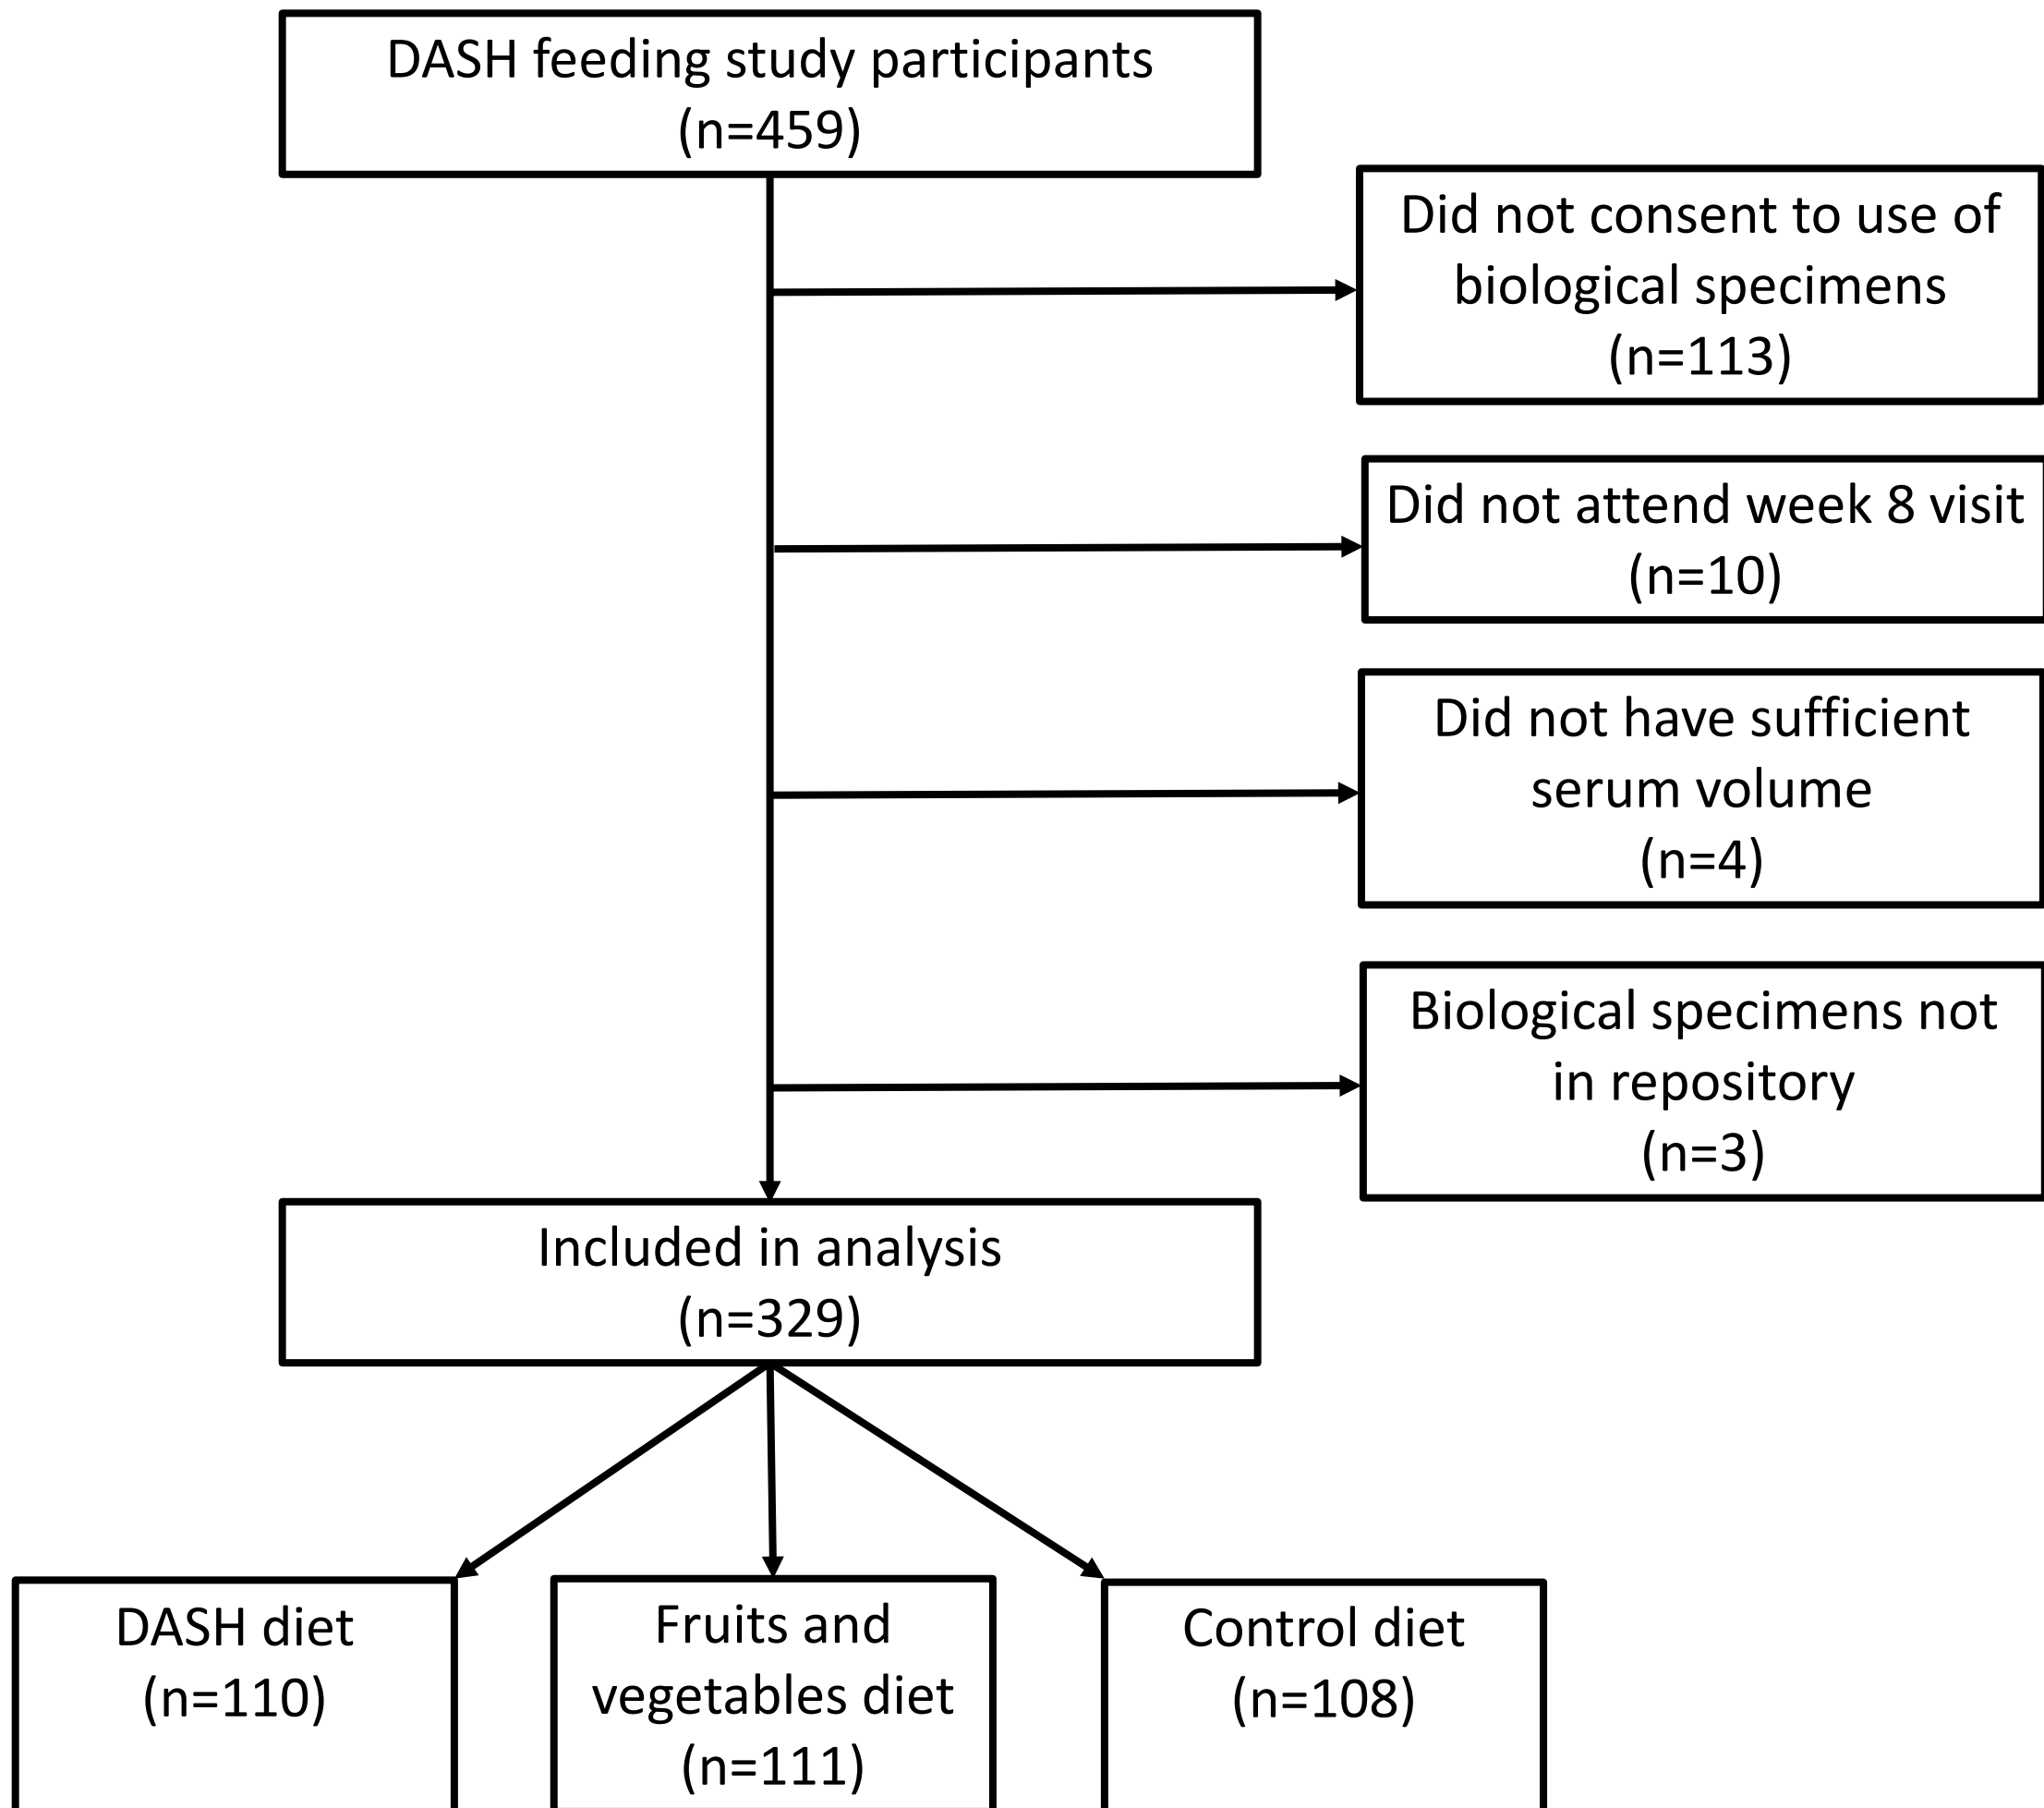

Supplement: nqy099_supplemental_figure.pdf [file nqy099_supplemental_figure.pdf]
